# Supplementary material for: Development and Characterization of Inula britannica Extract-Loaded Liposomes: Potential as Anti-Inflammatory Functional Food Ingredients
Source: MDPI journal article supplement (doi:10.3390/antiox12081636), 2023-08-18
Supplement: s1 [file s1]

## Supplementary Data

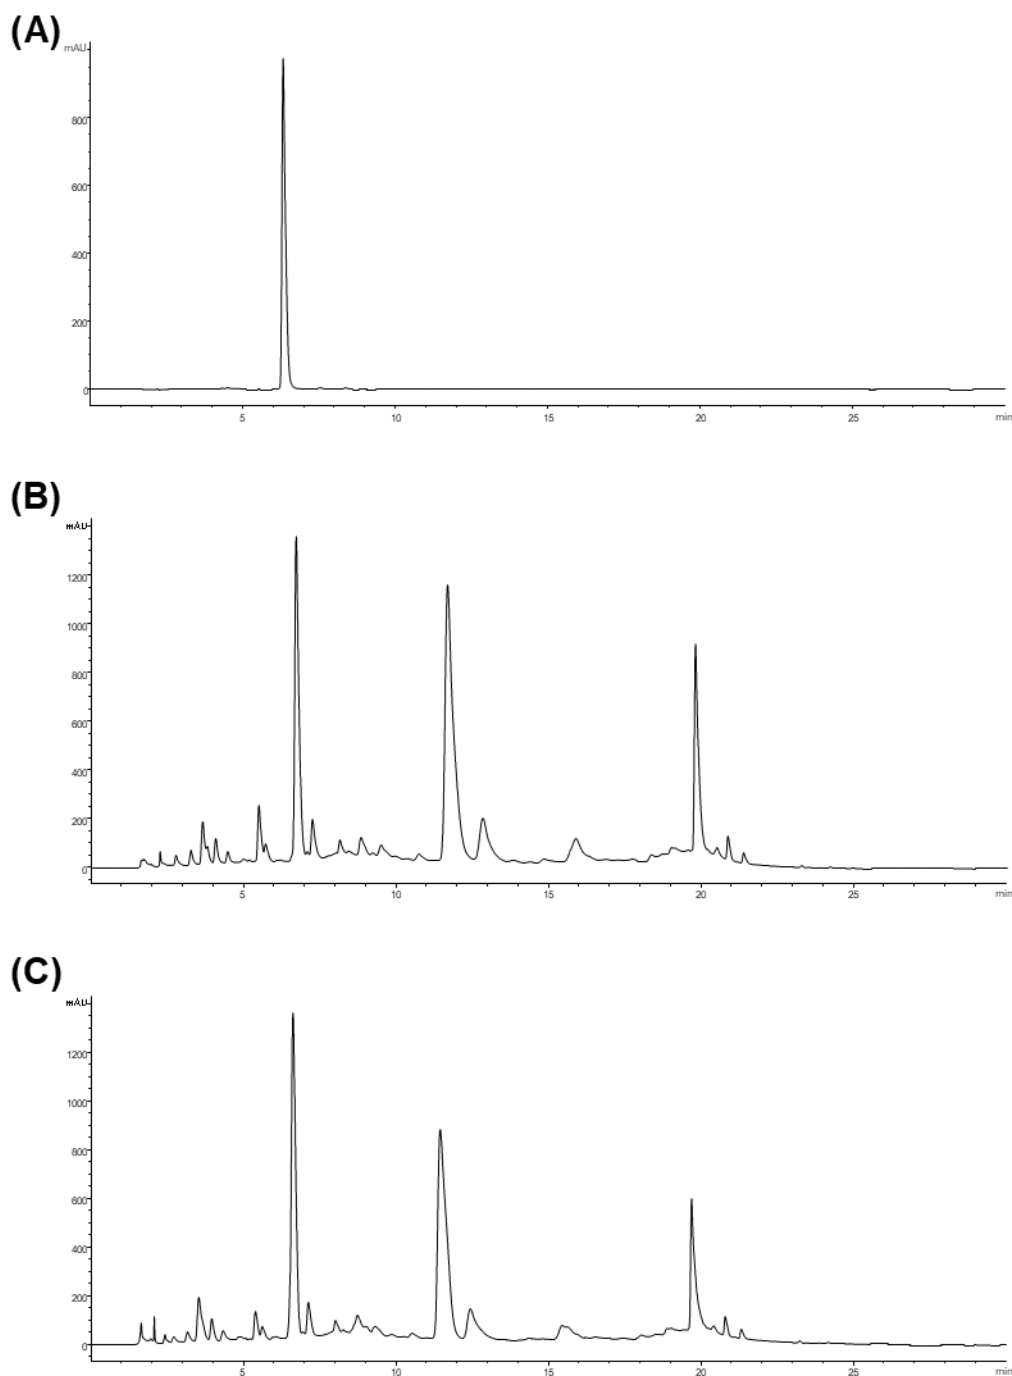

**Figure S1. High-performance liquid chromatography (HPLC) analysis of chlorogenic acid for determining the encapsulation efficiency of *I. britannica* extract in liposome.** HPLC chromatogram of chlorogenic acid contents of standard compound (A), *I. britannica* extract (B), *I. britannica* extract encapsulated in liposome (C).

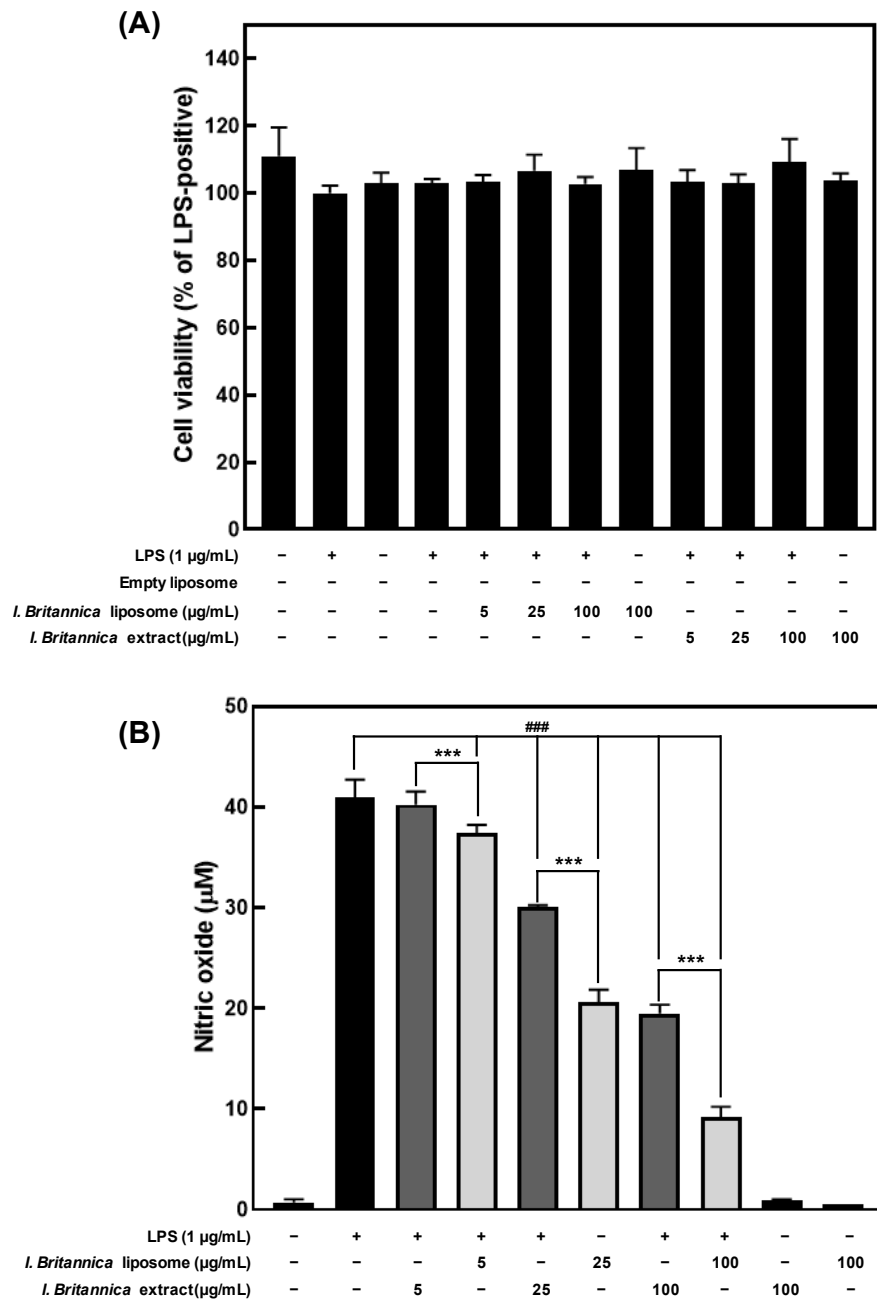

**Figure S2. Evaluation of cytotoxicity and anti-inflammatory effects of *I. britannica* extract and *I. britannica* extract encapsulated in liposomes in LPS-stimulated RAW 264.7 cells. (A) Cytotoxicity, (B) nitric oxide (NO) production measurement. Data are represented as mean  $\pm$  SEM (error bar). ### $p < 0.001$  versus to LPS-induced cells. \*\*\* $p < 0.001$  compared to both *I. britannica* extract and *I. britannica* extract encapsulated in liposomes. Data were statistically analyzed using one-way ANOVA followed by Tukey's post hoc test.**
